# Supplementary material for: Identification and Preliminary Structure-Activity Relationship Studies of 1,5-Dihydrobenzo[e][1,4]oxazepin-2(3H)-ones That Induce Differentiation of Acute Myeloid Leukemia Cells In Vitro
Source: MDPI journal article supplement (doi:10.3390/molecules26216648), 2021-11-02
Supplement: s1 [file s1]

# SUPPLEMENTARY INFORMATION

## Identification and Preliminary Structure-Activity Relationship Studies of 1,5-Dihydrobenzo[*e*][1,4]oxazepin-2(3*H*)-ones That Induce Differentiation of Acute Myeloid Leukemia Cells In Vitro

Laia Josa-Culleré <sup>1,\*</sup>, Thomas J. Cogswell <sup>1</sup>, Irene Georgiou <sup>1</sup>, Morgan Jay-Smith <sup>1</sup>, Thomas R. Jackson <sup>2</sup>, Carole J. R. Bataille <sup>1,3</sup>, Stephen G. Davies <sup>1</sup>, Paresh Vyas <sup>2</sup>, Thomas A. Milne <sup>2</sup>, Graham M. Wynne <sup>1</sup> and Angela J. Russell <sup>1,3,\*</sup>

<sup>1</sup> Department of Chemistry, Chemistry Research Laboratory, University of Oxford, Mansfield Road, Oxford OX1 3TA, UK; tom.cogs1@gmail.com (T.J.C.); igeorgiou001@dundee.ac.uk (I.G.); morgan.jaysmith@outlook.com (M.J.-S.); carole.bataille@pharm.ox.ac.uk (C.J.R.B.); steve.davies@chem.ox.ac.uk (S.G.D.); graham.wynne@yahoo.co.uk (G.M.W.)

<sup>2</sup> MRC Molecular Haematology Unit, MRC Weatherall Institute of Molecular Medicine, NIHR Oxford Biomedical Research Centre Haematology Theme, Radcliffe Department of Medicine, University of Oxford, Oxford OX3 9DS, UK; thomas.jackson@paediatrics.ox.ac.uk (T.R.J.); paresh.vyas@imm.ox.ac.uk (P.V.); thomas.milne@imm.ox.ac.uk (T.A.M.)

<sup>3</sup> Department of Pharmacology, University of Oxford, Mansfield Road, Oxford OX1 3QT, UK

\* Correspondence: laia.josacullere@gmail.com (L.J.-C.); angela.russell@chem.ox.ac.uk (A.J.R.)

A

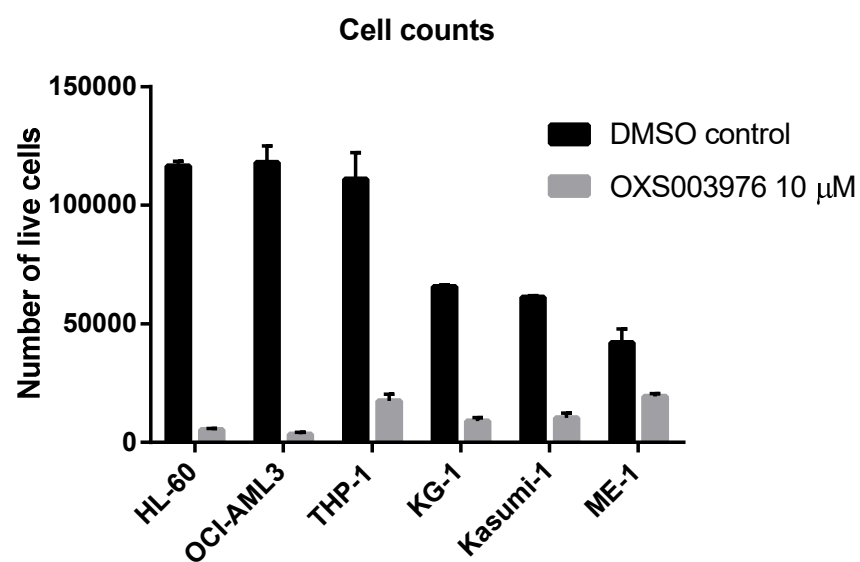

B

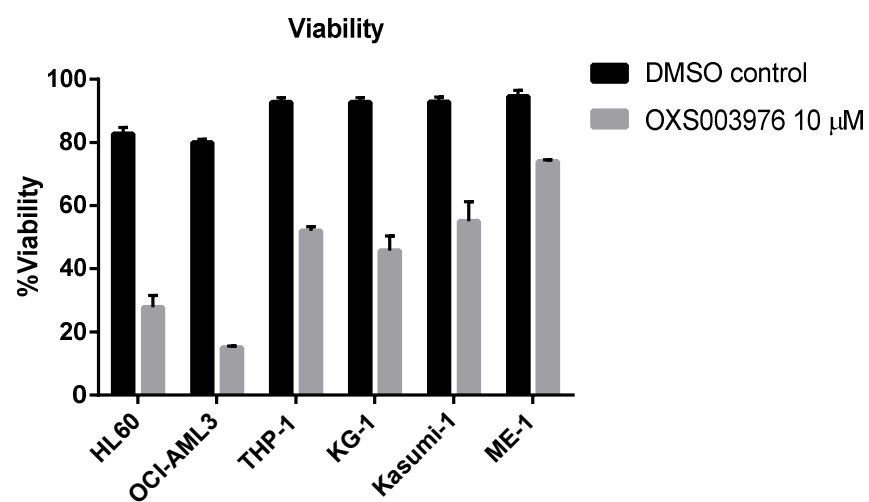

Figure S1. A) Number of live cells per well and B) %viability of cell lines treated with either DMSO control or 10  $\mu$ M OXS003976 over 4 days, determined with acridine orange and DAPI.

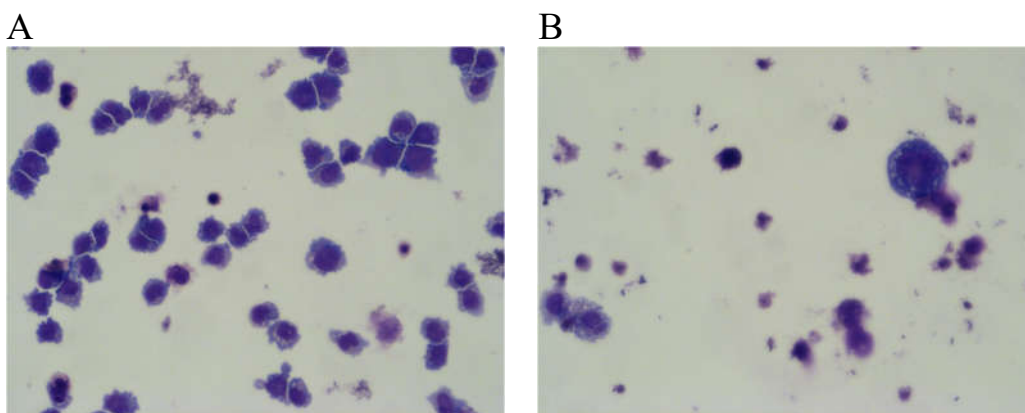

Figure S2. Cytopins of OCI-AML3 cells treated with (A) DMSO control or (B) 10  $\mu$ M OXS003976 stained with Modified Wright stain.

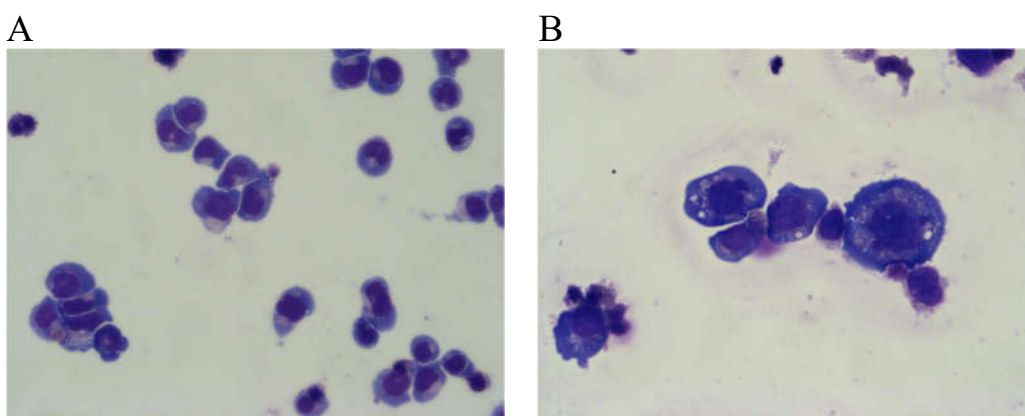

Figure S3. Cytopins of THP-1 cells treated with (A) DMSO control or (B) 10  $\mu$ M OXS003976 stained with Modified Wright stain.

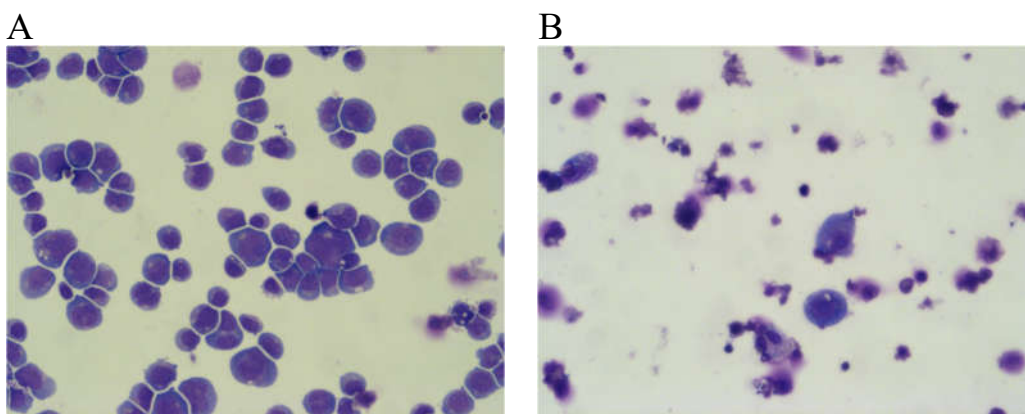

Figure S4. Cytopins of KG-1 cells treated with (A) DMSO control or (B) 10  $\mu$ M OXS003976 stained with Modified Wright stain.

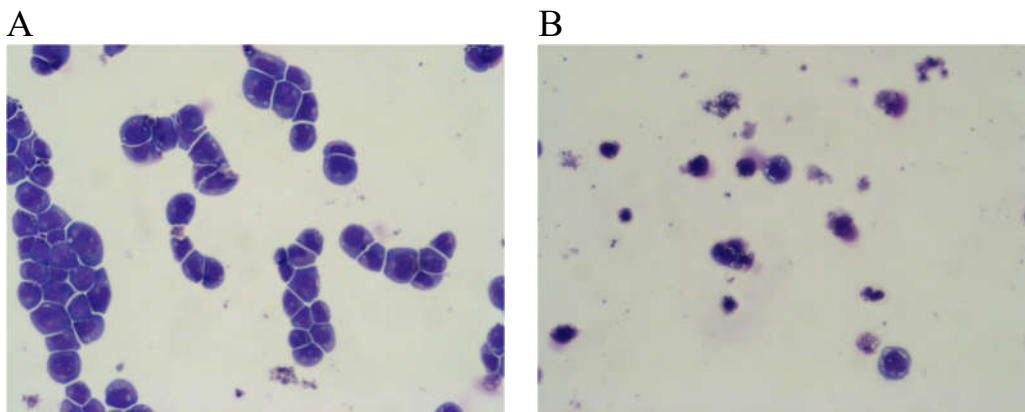

Figure S5. Cytopins of Kasumi-1 cells treated with (A) DMSO control or (B) 10  $\mu\text{M}$  OXS003976 stained with Modified Wright stain.

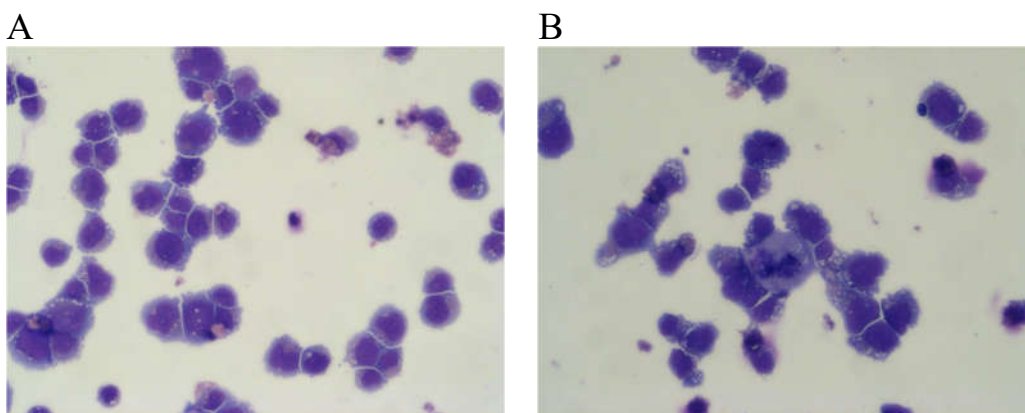

Figure S6. Cytopins of ME-1 cells treated with (A) DMSO control or (B) 10  $\mu\text{M}$  OXS003976 stained with Modified Wright stain.

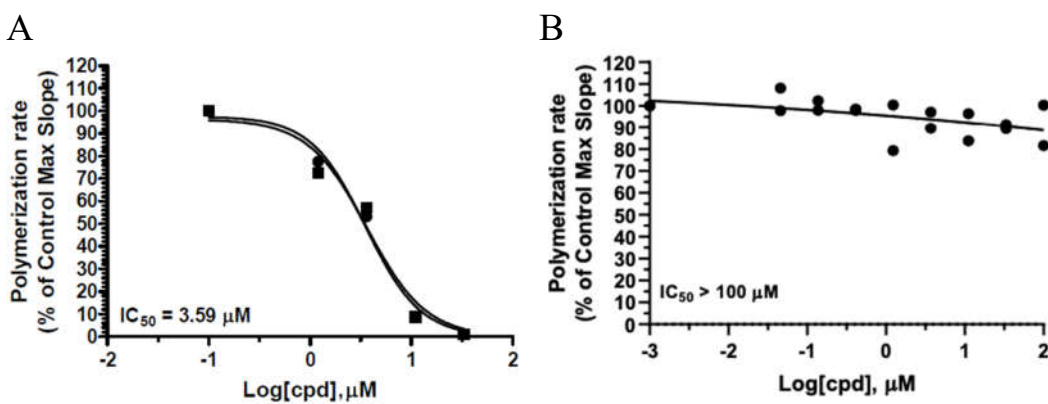

Figure S7. Inhibition of tubulin polymerisation by (A) OXS007002 and (B) **25**.
